# Supplementary material
Source: PubMed Central journal article supplement (PMC10529967)
Supplement: NIHMS1915733-supplement-4.pdf [file NIHMS1915733-supplement-4.pdf]

**Supplemental Table S2: Adverse events possibly, probably, or definitely related to ganitumab across all 28 cycles (maximum grade per patient)**

| Adverse event (AE)                   | AE grade (Number of patients) |   |   | Total number of patients with AE |
|--------------------------------------|-------------------------------|---|---|----------------------------------|
|                                      | 1                             | 2 | 3 |                                  |
| <b>Hematologic</b>                   |                               |   |   |                                  |
| Anemia                               | 4                             | 1 | 1 | 6                                |
| Lymphocyte count decreased           | 2                             | 2 |   | 4                                |
| Neutrophil count decreased           |                               | 1 | 1 | 2                                |
| Platelet count decreased             | 8                             | 2 |   | 10                               |
| White blood cell decreased           | 3                             | 1 |   | 4                                |
| <b>Non-hematologic</b>               |                               |   |   |                                  |
| Abdominal pain                       |                               | 1 |   | 1                                |
| Alanine aminotransferase increased   | 2                             |   |   | 2                                |
| Alkaline phosphatase increase        | 1                             |   |   | 1                                |
| Anorexia                             | 1                             |   |   | 1                                |
| Aspartate aminotransferase increased | 2                             | 1 |   | 3                                |
| Bilirubin increased                  | 1                             |   |   | 1                                |
| Bronchopulmonary hemorrhage          | 1                             |   |   | 1                                |
| Cough                                | 2                             |   |   | 2                                |
| Dehydration                          |                               | 1 |   | 1                                |
| Dyspnea                              | 1                             |   |   | 1                                |
| Epistaxis                            | 1                             |   |   | 1                                |
| Fatigue                              | 2                             | 1 |   | 3                                |
| Fever                                | 1                             |   |   | 1                                |
| Headache                             | 2                             |   |   | 2                                |
| Hemoptysis                           | 1                             |   |   | 1                                |
| Hypertension                         | 1                             |   |   | 1                                |
| Hyponatremia                         | 1                             |   |   | 1                                |
| Hypotension                          | 1                             |   |   | 1                                |
| Hypoxia                              |                               |   | 1 | 1                                |
| Nausea                               | 1                             |   |   | 1                                |
| Non-cardiac chest pain               | 1                             |   |   | 1                                |
| Pleural effusion                     |                               | 1 |   | 1                                |
| Pleuritic pain                       | 1                             |   |   | 1                                |
| Pneumonitis                          |                               |   | 1 | 1                                |
| Skin ulceration                      | 1                             |   |   | 1                                |
| Soft tissue infection                |                               | 1 |   | 1                                |
| Tachypnea                            | 1                             |   |   | 1                                |
| Tinnitus                             | 1                             |   |   | 1                                |
| Vomiting                             |                               |   | 1 | 1                                |
| Wheezing                             | 1                             |   |   | 1                                |
