# Supplementary material
Source: PubMed Central journal article supplement (PMC10529967)
Supplement: NIHMS1915733-supplement-5.pdf [file NIHMS1915733-supplement-5.pdf]

**Supplemental Table S3: Adverse events possibly probably or definitely related to dasatinib across all 28 cycles (maximum grade per patient)**

| Adverse event (AE)                   | AE grade (Number of patients) |   |   | Total number of patients with AE |
|--------------------------------------|-------------------------------|---|---|----------------------------------|
|                                      | 1                             | 2 | 3 |                                  |
| <b>Hematologic</b>                   |                               |   |   |                                  |
| Anemia                               | 3                             | 6 | 1 | 10                               |
| Lymphocyte count decreased           | 2                             | 5 | 1 | 8                                |
| Lymphocyte count increase            |                               | 1 |   | 1                                |
| Neutrophil count decreased           |                               | 1 | 1 | 2                                |
| Platelet count decreased             | 9                             | 2 | 1 | 12                               |
| White blood cell decreased           | 3                             | 1 |   | 4                                |
| <b>Non-hematologic</b>               |                               |   |   |                                  |
| Abdominal distention                 | 3                             | 1 |   | 4                                |
| Abdominal pain                       | 1                             |   |   | 1                                |
| Alanine aminotransferase increased   | 3                             |   |   | 3                                |
| Alkaline phosphatase increased       | 1                             |   |   | 1                                |
| Anorexia/Appetite decreased          | 4                             |   |   | 4                                |
| Aspartate aminotransferase increased | 3                             | 2 |   | 5                                |
| Back pain                            |                               | 1 |   | 1                                |
| Bilirubin increased                  | 1                             |   |   | 1                                |
| Bronchopulmonary hemorrhage          | 1                             |   |   | 1                                |
| Colitis                              |                               | 1 |   | 1                                |
| Constipation                         |                               | 1 |   | 1                                |
| Cough                                | 2                             |   |   | 2                                |
| Dehydration                          |                               | 1 |   | 1                                |
| Diarrhea                             | 3                             |   | 1 | 4                                |
| Dysphagia                            |                               | 1 |   | 1                                |
| Dyspnea                              | 1                             | 1 |   | 2                                |
| Edema                                | 3                             |   |   | 3                                |
| Epistaxis                            | 1                             |   |   | 1                                |
| Fatigue                              | 3                             | 2 |   | 5                                |
| Fever                                | 1                             |   |   | 1                                |
| Headache                             |                               | 1 |   | 1                                |
| Hematuria                            |                               |   | 1 | 1                                |
| Hemoptysis                           | 1                             |   |   | 1                                |
| Hyperkalemia                         | 1                             |   |   | 1                                |
| Hypoalbuminemia                      | 1                             |   |   | 1                                |
| Hypocalcemia                         | 2                             | 4 |   | 6                                |
| Hypokalemia                          | 2                             |   | 2 | 4                                |
| Hypomagnesemia                       | 2                             |   |   | 2                                |
| Hyponatremia                         | 2                             | 1 |   | 3                                |
| Hypophosphatemia                     | 2                             | 4 | 1 | 7                                |
| Hypoxia                              |                               |   | 1 | 1                                |
| Malaise                              | 1                             |   |   | 1                                |
| Nausea                               | 4                             | 2 |   | 6                                |
| Non-cardiac chest pain               | 1                             |   |   | 1                                |
| Pain in extremity                    | 1                             |   |   | 1                                |
| Pericardial effusion                 |                               | 3 |   | 3                                |
| Photosensitivity                     | 1                             |   |   | 1                                |
| Pleural effusion                     | 1                             | 2 |   | 3                                |
| Pleuritic pain                       | 2                             |   |   | 2                                |
| Pneumonitis                          |                               |   | 1 | 1                                |
| Pneumothorax                         | 1                             |   |   | 1                                |

|                       |   |   |  |   |
|-----------------------|---|---|--|---|
| Rash acneiform        | 3 |   |  | 3 |
| Skin ulceration       | 1 |   |  | 1 |
| Soft tissue infection |   | 1 |  | 1 |
| Suprapubic distention | 1 |   |  | 1 |
| Tachypnea             | 1 |   |  | 1 |
| Vomiting              | 4 |   |  | 4 |
| Weight gain           | 1 |   |  | 1 |
| Weight loss           | 1 |   |  | 1 |
| Wheezing              | 1 |   |  | 1 |
