# Supplementary material
Source: PubMed Central journal article supplement (PMC10529967)
Supplement: NIHMS1915733-supplement-6.pdf [file NIHMS1915733-supplement-6.pdf]

**Supplemental Table S4: Tumor fractions from plasma cfDNA.**

Tumor fractions and calculated fold changes in tumor fraction for all study samples.

| <b>Subject</b> | <b>Sample</b> | <b>Tumor Fraction</b> | <b>Fold Change</b> |
|----------------|---------------|-----------------------|--------------------|
| 1              | 1_1           | 0.39                  | 1.00               |
| 1              | 1_2           | 0.46                  | 1.18               |
| 2              | 2_1           | 0.20                  | 1.00               |
| 3              | 3_1           | 0.24                  | 1.00               |
| 3              | 3_2           | 0.30                  | 1.26               |
| 4              | 4_1           | 0.03                  | 1.00               |
| 4              | 4_2           | 0.06                  | 1.79               |
| 4              | 4_3           | 0.02                  | 0.72               |
| 4              | 4_4           | 0.04                  | 1.10               |
| 4              | 4_5           | 0.04                  | 1.39               |
| 4              | 4_6           | 0.07                  | 2.13               |
| 4              | 4_7           | 0.03                  | 1.02               |
| 5              | 5_1           | 0.05                  | 1.00               |
| 6              | 6_1           | 0.30                  | 1.00               |
| 6              | 6_2           | 0.30                  | 0.98               |
| 7              | 7_1           | 0.02                  | 1.00               |
| 7              | 7_2           | 0.02                  | 1.08               |
| 7              | 7_3           | 0.02                  | 1.51               |
| 8              | 8_1           | 0.00                  | 1.00               |
| 9              | 9_1           | 0.03                  | 1.00               |
| 10             | 10_1          | Not available         | Not available      |
| 10             | 10_2          | 0.00                  | 1.00               |
| 10             | 10_3          | 0.03                  | 1.03               |
| 10             | 10_4          | 0.03                  | 1.06               |
| 10             | 10_5          | 0.03                  | 1.09               |
| 11             | 11_1          | 0.17                  | 1.00               |
| 11             | 11_2          | 0.12                  | 0.70               |
| 12             | 12_1          | 0.33                  | 1.00               |
| 12             | 12_2          | 0.38                  | 1.14               |

| <b>Interquartile Range (IQR)</b> |       |
|----------------------------------|-------|
| Mean:                            | 0.132 |
| Quartile 1:                      | 0.027 |
| Quartile 3:                      | 0.252 |
