# Supplementary material
Source: PubMed Central journal article supplement (PMC10529967)
Supplement: NIHMS1915733-supplement-8.pdf [file NIHMS1915733-supplement-8.pdf]

## Supplemental Figure S1

**A**

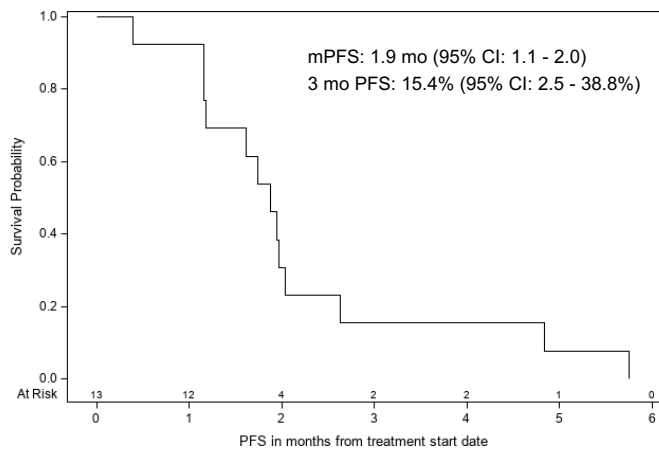

**B**

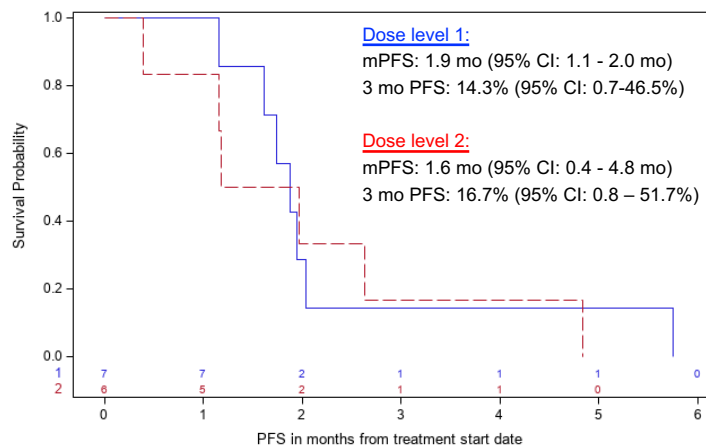

**Supplemental Figure S1:** Progression-free survival for full cohort of patients (**A**) and by dose level (**B**).
