# Supplementary material
Source: PubMed Central journal article supplement (PMC10529967)
Supplement: NIHMS1915733-supplement-9.pdf [file NIHMS1915733-supplement-9.pdf]

## Supplemental Figure S2

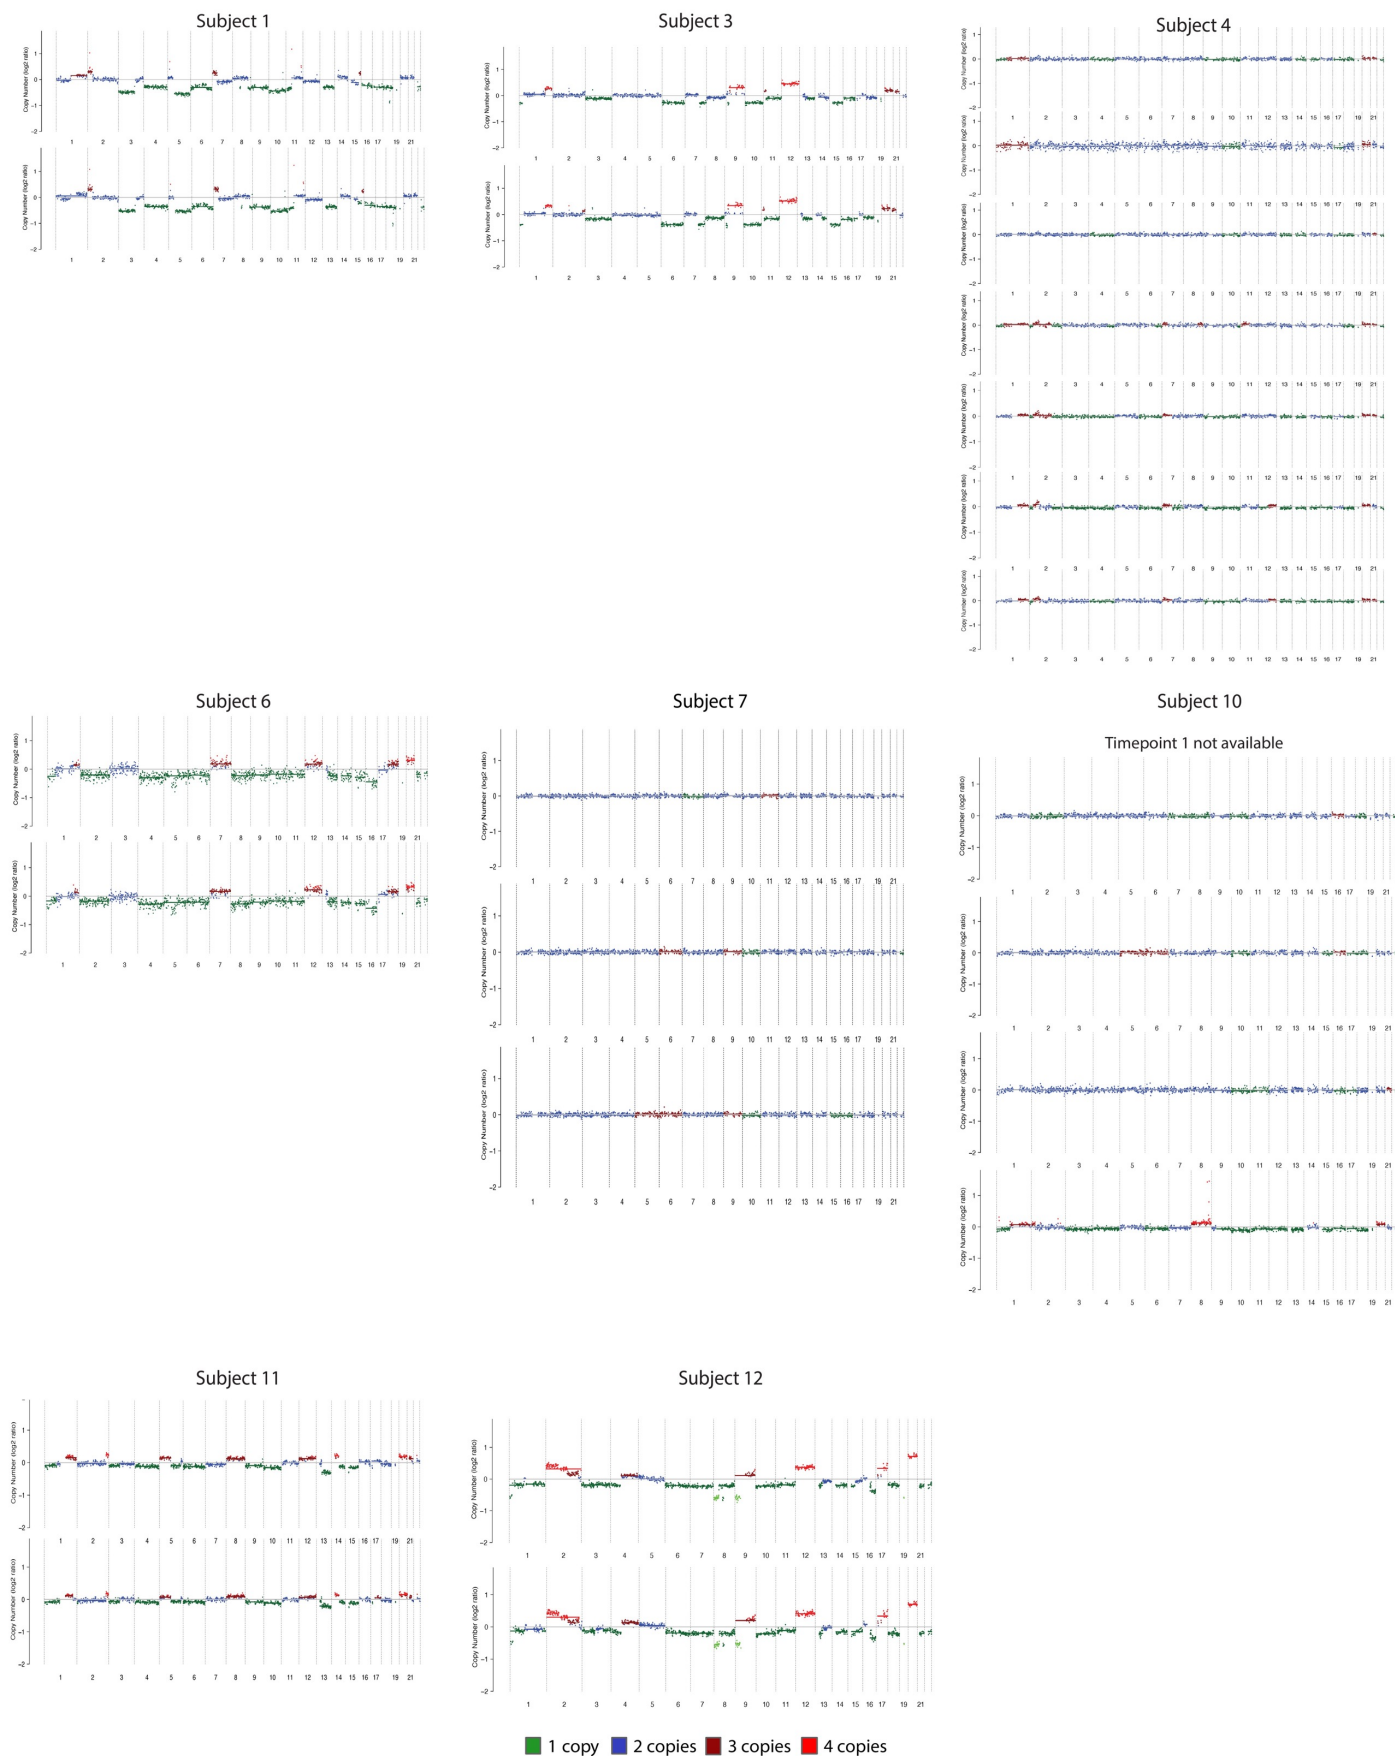

**Supplemental Figure S2: Serial samples demonstrate recurrent loci with copy number alterations for each patient.** Genome-wide CNA assessed in serial samples per patient. Log2 of copy number ratio is shown across the genome with color scale depicting estimated copy number within the tumor fraction.
